# Supplementary material for: A novel, machine-learning model for prediction of short-term ASCVD risk over 90 and 365 days
Source: PubMed Central journal article supplement (PMC11564171; doi:10.3389/fdgth.2024.1485508), 2024-11-01

# *Supplementary Material*

## **1 Supplementary Text**

### ASCVD Event Classification

ASCVD classification initiated with a search for ASCVD (ACS or CVA) condition, as depicted by ICD9, ICD10 and SNOMEDCT codes (Table S1-S2). Following, a semi-automated labeling algorithm was applied (Figures S1-S2). Participants were classified to three subgroups:

1. Participants with a specific documented date of onset were considered positive cases with the specified dates.
2. Participants with the ASCVD codes but not in subgroup 1 due to no specific date were evaluated manually by trained medical annotators (LV & GP) according to the guidelines described below. Verified cases were considered positive examples. Non-verified cases were excluded from the analysis.
3. Participants not in subgroups 1 or 2 but with a code for a historical ASCVD event were excluded because their date could not be verified.

For participants with more than one validated event, only the first event was used.

### Guidelines for Manual Labeling of Subgroup 2

#### ACS

1. Unstructured EHR data was manually searched for admission of more than 12 hours with clear ACS cause.
2. For cases with unstructured admission, annotators were instructed to search for ECG or Troponin during the admission. Cases that matched these conditions were considered validated cases from unstructured data.
3. Non-validated cases were excluded from the analysis.

#### CVA

1. Unstructured HER data were manually searched for admission of more than 12 hours with clear CVA cause.
2. For cases with unstructured admission, annotators were instructed to search for Head CT or CTA during the admission. Cases that matched these conditions were considered validated cases from unstructured data.
3. Non-validated cases were excluded from the analysis.

## **2 Supplementary Tables and Figures**

### **2.1 Supplementary Tables**

**Supplementary Table 1. Medical codes used for ACS and CVA event classification.**

| <b>Name</b> | <b>System</b> | <b>Code</b> |
|-------------|---------------|-------------|
| ACS         | ICD10CM       | I20.0       |
| ACS         | ICD10CM       | I21         |
| ACS         | ICD10CM       | I21.0       |
| ACS         | ICD10CM       | I21.01      |
| ACS         | ICD10CM       | I21.02      |
| ACS         | ICD10CM       | I21.09      |
| ACS         | ICD10CM       | I21.1       |
| ACS         | ICD10CM       | I21.11      |
| ACS         | ICD10CM       | I21.19      |
| ACS         | ICD10CM       | I21.2       |
| ACS         | ICD10CM       | I21.21      |
| ACS         | ICD10CM       | I21.29      |
| ACS         | ICD10CM       | I21.3       |
| ACS         | ICD10CM       | I21.4       |
| ACS         | ICD10CM       | I21.9       |
| ACS         | ICD10CM       | I21.A       |
| ACS         | ICD10CM       | I21.A1      |
| ACS         | ICD10CM       | I21.A9      |
| ACS         | ICD10CM       | I22         |
| ACS         | ICD10CM       | I22.0       |
| ACS         | ICD10CM       | I22.1       |
| ACS         | ICD10CM       | I22.2       |
| ACS         | ICD10CM       | I22.8       |
| ACS         | ICD10CM       | I22.9       |
| ACS         | ICD10CM       | I24         |
| ACS         | ICD10CM       | I24.0       |
| ACS         | ICD10CM       | I24.1       |

|     |         |         |
|-----|---------|---------|
| ACS | ICD10CM | I24.8   |
| ACS | ICD10CM | I24.9   |
| ACS | ICD10CM | I25.110 |
| ACS | ICD10CM | I25.700 |
| ACS | ICD10CM | I25.710 |
| ACS | ICD10CM | I25.720 |
| ACS | ICD10CM | I25.730 |
| ACS | ICD10CM | I25.750 |
| ACS | ICD10CM | I25.760 |
| ACS | ICD10CM | I25.790 |
| ACS | ICD9CM  | 410.0   |
| ACS | ICD9CM  | 410.00  |
| ACS | ICD9CM  | 410.01  |
| ACS | ICD9CM  | 410.02  |
| ACS | ICD9CM  | 410.1   |
| ACS | ICD9CM  | 410.10  |
| ACS | ICD9CM  | 410.11  |
| ACS | ICD9CM  | 410.12  |
| ACS | ICD9CM  | 410.2   |
| ACS | ICD9CM  | 410.20  |
| ACS | ICD9CM  | 410.21  |
| ACS | ICD9CM  | 410.22  |
| ACS | ICD9CM  | 410.3   |
| ACS | ICD9CM  | 410.30  |
| ACS | ICD9CM  | 410.31  |
| ACS | ICD9CM  | 410.32  |
| ACS | ICD9CM  | 410.4   |
| ACS | ICD9CM  | 410.40  |
| ACS | ICD9CM  | 410.41  |

|     |             |                   |
|-----|-------------|-------------------|
| ACS | ICD9CM      | 410.42            |
| ACS | ICD9CM      | 410.5             |
| ACS | ICD9CM      | 410.50            |
| ACS | ICD9CM      | 410.51            |
| ACS | ICD9CM      | 410.52            |
| ACS | ICD9CM      | 410.6             |
| ACS | ICD9CM      | 410.60            |
| ACS | ICD9CM      | 410.61            |
| ACS | ICD9CM      | 410.62            |
| ACS | ICD9CM      | 410.7             |
| ACS | ICD9CM      | 410.70            |
| ACS | ICD9CM      | 410.71            |
| ACS | ICD9CM      | 410.72            |
| ACS | ICD9CM      | 410.8             |
| ACS | ICD9CM      | 410.80            |
| ACS | ICD9CM      | 410.81            |
| ACS | ICD9CM      | 410.82            |
| ACS | ICD9CM      | 410.9             |
| ACS | ICD9CM      | 410.90            |
| ACS | ICD9CM      | 410.91            |
| ACS | ICD9CM      | 410.92            |
| ACS | ICD9CM      | 411.1             |
| ACS | ICD9CM      | 411.8             |
| ACS | ICD9CM      | 411.81            |
| ACS | ICD9CM      | 411.89            |
| ACS | SNOMEDCT_US | 12238111000119106 |
| ACS | SNOMEDCT_US | 12238151000119107 |
| ACS | SNOMEDCT_US | 142025003         |
| ACS | SNOMEDCT_US | 155304006         |

|     |             |                   |
|-----|-------------|-------------------|
| ACS | SNOMEDCT_US | 155308009         |
| ACS | SNOMEDCT_US | 15712841000119100 |
| ACS | SNOMEDCT_US | 15712881000119105 |
| ACS | SNOMEDCT_US | 15712921000119103 |
| ACS | SNOMEDCT_US | 15712961000119108 |
| ACS | SNOMEDCT_US | 15713041000119103 |
| ACS | SNOMEDCT_US | 15713081000119108 |
| ACS | SNOMEDCT_US | 15713121000119105 |
| ACS | SNOMEDCT_US | 15713161000119100 |
| ACS | SNOMEDCT_US | 15713201000119105 |
| ACS | SNOMEDCT_US | 15960061000119102 |
| ACS | SNOMEDCT_US | 15960541000119107 |
| ACS | SNOMEDCT_US | 15960661000119107 |
| ACS | SNOMEDCT_US | 15962541000119106 |
| ACS | SNOMEDCT_US | 15963181000119104 |
| ACS | SNOMEDCT_US | 15990001          |
| ACS | SNOMEDCT_US | 164865005         |
| ACS | SNOMEDCT_US | 16837681000119104 |
| ACS | SNOMEDCT_US | 17531000119105    |
| ACS | SNOMEDCT_US | 194796000         |
| ACS | SNOMEDCT_US | 194797009         |
| ACS | SNOMEDCT_US | 194799007         |
| ACS | SNOMEDCT_US | 194800006         |
| ACS | SNOMEDCT_US | 194801005         |
| ACS | SNOMEDCT_US | 194802003         |
| ACS | SNOMEDCT_US | 194804002         |
| ACS | SNOMEDCT_US | 194808004         |
| ACS | SNOMEDCT_US | 194810002         |
| ACS | SNOMEDCT_US | 194811003         |

|     |             |                 |
|-----|-------------|-----------------|
| ACS | SNOMEDCT_US | 194814006       |
| ACS | SNOMEDCT_US | 194816008       |
| ACS | SNOMEDCT_US | 194856005       |
| ACS | SNOMEDCT_US | 194857001       |
| ACS | SNOMEDCT_US | 194858006       |
| ACS | SNOMEDCT_US | 194859003       |
| ACS | SNOMEDCT_US | 195547003       |
| ACS | SNOMEDCT_US | 22298006        |
| ACS | SNOMEDCT_US | 23311000119105  |
| ACS | SNOMEDCT_US | 233820004       |
| ACS | SNOMEDCT_US | 233835003       |
| ACS | SNOMEDCT_US | 233838001       |
| ACS | SNOMEDCT_US | 233843008       |
| ACS | SNOMEDCT_US | 266288001       |
| ACS | SNOMEDCT_US | 282006          |
| ACS | SNOMEDCT_US | 285721000119104 |
| ACS | SNOMEDCT_US | 285981000119103 |
| ACS | SNOMEDCT_US | 285991000119100 |
| ACS | SNOMEDCT_US | 30277009        |
| ACS | SNOMEDCT_US | 304914007       |
| ACS | SNOMEDCT_US | 311792005       |
| ACS | SNOMEDCT_US | 371068009       |
| ACS | SNOMEDCT_US | 394659003       |
| ACS | SNOMEDCT_US | 394710008       |
| ACS | SNOMEDCT_US | 401303003       |
| ACS | SNOMEDCT_US | 401314000       |
| ACS | SNOMEDCT_US | 428196007       |
| ACS | SNOMEDCT_US | 429731003       |
| ACS | SNOMEDCT_US | 4557003         |

|     |             |           |
|-----|-------------|-----------|
| ACS | SNOMEDCT_US | 52035003  |
| ACS | SNOMEDCT_US | 54329005  |
| ACS | SNOMEDCT_US | 57054005  |
| ACS | SNOMEDCT_US | 58612006  |
| ACS | SNOMEDCT_US | 59063002  |
| ACS | SNOMEDCT_US | 62695002  |
| ACS | SNOMEDCT_US | 65547006  |
| ACS | SNOMEDCT_US | 70211005  |
| ACS | SNOMEDCT_US | 703164000 |
| ACS | SNOMEDCT_US | 703165004 |
| ACS | SNOMEDCT_US | 703209002 |
| ACS | SNOMEDCT_US | 703210007 |
| ACS | SNOMEDCT_US | 703211006 |
| ACS | SNOMEDCT_US | 703212004 |
| ACS | SNOMEDCT_US | 703213009 |
| ACS | SNOMEDCT_US | 703251009 |
| ACS | SNOMEDCT_US | 703252002 |
| ACS | SNOMEDCT_US | 703253007 |
| ACS | SNOMEDCT_US | 703360004 |
| ACS | SNOMEDCT_US | 70998009  |
| ACS | SNOMEDCT_US | 72977004  |
| ACS | SNOMEDCT_US | 7326005   |
| ACS | SNOMEDCT_US | 73795002  |
| ACS | SNOMEDCT_US | 73999000  |
| ACS | SNOMEDCT_US | 76593002  |
| ACS | SNOMEDCT_US | 79009004  |
| ACS | SNOMEDCT_US | 91335003  |
| CVA | ICD10CM     | I60.00    |
| CVA | ICD10CM     | I60.01    |

|     |         |        |
|-----|---------|--------|
| CVA | ICD10CM | I60.02 |
| CVA | ICD10CM | I60.1  |
| CVA | ICD10CM | I60.10 |
| CVA | ICD10CM | I60.11 |
| CVA | ICD10CM | I60.12 |
| CVA | ICD10CM | I60.2  |
| CVA | ICD10CM | I60.3  |
| CVA | ICD10CM | I60.30 |
| CVA | ICD10CM | I60.31 |
| CVA | ICD10CM | I60.32 |
| CVA | ICD10CM | I60.4  |
| CVA | ICD10CM | I60.5  |
| CVA | ICD10CM | I60.50 |
| CVA | ICD10CM | I60.51 |
| CVA | ICD10CM | I60.52 |
| CVA | ICD10CM | I60.6  |
| CVA | ICD10CM | I60.7  |
| CVA | ICD10CM | I60.8  |
| CVA | ICD10CM | I60.9  |
| CVA | ICD10CM | I61    |
| CVA | ICD10CM | I61.0  |
| CVA | ICD10CM | I61.1  |
| CVA | ICD10CM | I61.2  |
| CVA | ICD10CM | I61.3  |
| CVA | ICD10CM | I61.4  |
| CVA | ICD10CM | I61.5  |
| CVA | ICD10CM | I61.6  |
| CVA | ICD10CM | I61.8  |
| CVA | ICD10CM | I61.9  |



|     |         |         |
|-----|---------|---------|
| CVA | ICD10CM | I63     |
| CVA | ICD10CM | I63.0   |
| CVA | ICD10CM | I63.00  |
| CVA | ICD10CM | I63.01  |
| CVA | ICD10CM | I63.011 |
| CVA | ICD10CM | I63.012 |
| CVA | ICD10CM | I63.013 |
| CVA | ICD10CM | I63.019 |
| CVA | ICD10CM | I63.02  |
| CVA | ICD10CM | I63.03  |
| CVA | ICD10CM | I63.031 |
| CVA | ICD10CM | I63.032 |
| CVA | ICD10CM | I63.033 |
| CVA | ICD10CM | I63.039 |
| CVA | ICD10CM | I63.09  |
| CVA | ICD10CM | I63.1   |
| CVA | ICD10CM | I63.10  |
| CVA | ICD10CM | I63.111 |
| CVA | ICD10CM | I63.112 |
| CVA | ICD10CM | I63.113 |
| CVA | ICD10CM | I63.119 |
| CVA | ICD10CM | I63.12  |
| CVA | ICD10CM | I63.13  |
| CVA | ICD10CM | I63.131 |
| CVA | ICD10CM | I63.132 |
| CVA | ICD10CM | I63.133 |
| CVA | ICD10CM | I63.139 |
| CVA | ICD10CM | I63.19  |
| CVA | ICD10CM | I63.2   |

|     |         |         |
|-----|---------|---------|
| CVA | ICD10CM | I63.20  |
| CVA | ICD10CM | I63.21  |
| CVA | ICD10CM | I63.211 |
| CVA | ICD10CM | I63.212 |
| CVA | ICD10CM | I63.213 |
| CVA | ICD10CM | I63.219 |
| CVA | ICD10CM | I63.22  |
| CVA | ICD10CM | I63.23  |
| CVA | ICD10CM | I63.231 |
| CVA | ICD10CM | I63.232 |
| CVA | ICD10CM | I63.233 |
| CVA | ICD10CM | I63.239 |
| CVA | ICD10CM | I63.29  |
| CVA | ICD10CM | I63.3   |
| CVA | ICD10CM | I63.30  |
| CVA | ICD10CM | I63.31  |
| CVA | ICD10CM | I63.311 |
| CVA | ICD10CM | I63.312 |
| CVA | ICD10CM | I63.313 |
| CVA | ICD10CM | I63.319 |
| CVA | ICD10CM | I63.32  |
| CVA | ICD10CM | I63.321 |
| CVA | ICD10CM | I63.322 |
| CVA | ICD10CM | I63.323 |
| CVA | ICD10CM | I63.329 |
| CVA | ICD10CM | I63.33  |
| CVA | ICD10CM | I63.331 |
| CVA | ICD10CM | I63.332 |
| CVA | ICD10CM | I63.333 |

|     |         |         |
|-----|---------|---------|
| CVA | ICD10CM | I63.339 |
| CVA | ICD10CM | I63.34  |
| CVA | ICD10CM | I63.341 |
| CVA | ICD10CM | I63.342 |
| CVA | ICD10CM | I63.343 |
| CVA | ICD10CM | I63.349 |
| CVA | ICD10CM | I63.39  |
| CVA | ICD10CM | I63.4   |
| CVA | ICD10CM | I63.40  |
| CVA | ICD10CM | I63.41  |
| CVA | ICD10CM | I63.411 |
| CVA | ICD10CM | I63.412 |
| CVA | ICD10CM | I63.413 |
| CVA | ICD10CM | I63.419 |
| CVA | ICD10CM | I63.42  |
| CVA | ICD10CM | I63.421 |
| CVA | ICD10CM | I63.422 |
| CVA | ICD10CM | I63.423 |
| CVA | ICD10CM | I63.429 |
| CVA | ICD10CM | I63.43  |
| CVA | ICD10CM | I63.431 |
| CVA | ICD10CM | I63.432 |
| CVA | ICD10CM | I63.433 |
| CVA | ICD10CM | I63.439 |
| CVA | ICD10CM | I63.44  |
| CVA | ICD10CM | I63.441 |
| CVA | ICD10CM | I63.442 |
| CVA | ICD10CM | I63.443 |
| CVA | ICD10CM | I63.449 |

|     |         |         |
|-----|---------|---------|
| CVA | ICD10CM | I63.49  |
| CVA | ICD10CM | I63.5   |
| CVA | ICD10CM | I63.50  |
| CVA | ICD10CM | I63.51  |
| CVA | ICD10CM | I63.511 |
| CVA | ICD10CM | I63.512 |
| CVA | ICD10CM | I63.513 |
| CVA | ICD10CM | I63.519 |
| CVA | ICD10CM | I63.52  |
| CVA | ICD10CM | I63.521 |
| CVA | ICD10CM | I63.522 |
| CVA | ICD10CM | I63.523 |
| CVA | ICD10CM | I63.529 |
| CVA | ICD10CM | I63.53  |
| CVA | ICD10CM | I63.531 |
| CVA | ICD10CM | I63.532 |
| CVA | ICD10CM | I63.533 |
| CVA | ICD10CM | I63.539 |
| CVA | ICD10CM | I63.54  |
| CVA | ICD10CM | I63.541 |
| CVA | ICD10CM | I63.542 |
| CVA | ICD10CM | I63.543 |
| CVA | ICD10CM | I63.549 |
| CVA | ICD10CM | I63.59  |
| CVA | ICD10CM | I63.6   |
| CVA | ICD10CM | I63.8   |
| CVA | ICD10CM | I63.81  |
| CVA | ICD10CM | I63.89  |
| CVA | ICD10CM | I63.9   |

|     |        |        |
|-----|--------|--------|
| CVA | ICD9CM | 430    |
| CVA | ICD9CM | 431    |
| CVA | ICD9CM | 432    |
| CVA | ICD9CM | 432.0  |
| CVA | ICD9CM | 432.1  |
| CVA | ICD9CM | 432.9  |
| CVA | ICD9CM | 433    |
| CVA | ICD9CM | 433.0  |
| CVA | ICD9CM | 433.00 |
| CVA | ICD9CM | 433.01 |
| CVA | ICD9CM | 433.1  |
| CVA | ICD9CM | 433.11 |
| CVA | ICD9CM | 433.2  |
| CVA | ICD9CM | 433.20 |
| CVA | ICD9CM | 433.21 |
| CVA | ICD9CM | 433.3  |
| CVA | ICD9CM | 433.31 |
| CVA | ICD9CM | 433.8  |
| CVA | ICD9CM | 433.80 |
| CVA | ICD9CM | 433.81 |
| CVA | ICD9CM | 433.9  |
| CVA | ICD9CM | 433.90 |
| CVA | ICD9CM | 433.91 |
| CVA | ICD9CM | 434    |
| CVA | ICD9CM | 434.0  |
| CVA | ICD9CM | 434.00 |
| CVA | ICD9CM | 434.01 |
| CVA | ICD9CM | 434.1  |
| CVA | ICD9CM | 434.10 |

|     |             |                   |
|-----|-------------|-------------------|
| CVA | ICD9CM      | 434.11            |
| CVA | ICD9CM      | 434.9             |
| CVA | ICD9CM      | 434.90            |
| CVA | ICD9CM      | 434.91            |
| CVA | ICD9CM      | 435               |
| CVA | ICD9CM      | 435.0             |
| CVA | ICD9CM      | 435.1             |
| CVA | ICD9CM      | 435.2             |
| CVA | ICD9CM      | 435.3             |
| CVA | ICD9CM      | 435.8             |
| CVA | ICD9CM      | 435.9             |
| CVA | ICD9CM      | 436               |
| CVA | SNOMEDCT_US | 111297002         |
| CVA | SNOMEDCT_US | 116288000         |
| CVA | SNOMEDCT_US | 140911000119109   |
| CVA | SNOMEDCT_US | 140921000119102   |
| CVA | SNOMEDCT_US | 14309005          |
| CVA | SNOMEDCT_US | 155388006         |
| CVA | SNOMEDCT_US | 16000471000119107 |
| CVA | SNOMEDCT_US | 16000551000119102 |
| CVA | SNOMEDCT_US | 16002031000119102 |
| CVA | SNOMEDCT_US | 16002111000119106 |
| CVA | SNOMEDCT_US | 16002151000119107 |
| CVA | SNOMEDCT_US | 16002511000119104 |
| CVA | SNOMEDCT_US | 16023911000119108 |
| CVA | SNOMEDCT_US | 16023991000119104 |
| CVA | SNOMEDCT_US | 16024031000119100 |
| CVA | SNOMEDCT_US | 16024111000119109 |
| CVA | SNOMEDCT_US | 16024151000119105 |

|     |             |                   |
|-----|-------------|-------------------|
| CVA | SNOMEDCT_US | 16024191000119100 |
| CVA | SNOMEDCT_US | 16024231000119109 |
| CVA | SNOMEDCT_US | 16024271000119107 |
| CVA | SNOMEDCT_US | 16026951000119102 |
| CVA | SNOMEDCT_US | 16026991000119107 |
| CVA | SNOMEDCT_US | 16371781000119100 |
| CVA | SNOMEDCT_US | 16661971000119104 |
| CVA | SNOMEDCT_US | 16891111000119104 |
| CVA | SNOMEDCT_US | 195163003         |
| CVA | SNOMEDCT_US | 195208004         |
| CVA | SNOMEDCT_US | 195212005         |
| CVA | SNOMEDCT_US | 195213000         |
| CVA | SNOMEDCT_US | 195216008         |
| CVA | SNOMEDCT_US | 195217004         |
| CVA | SNOMEDCT_US | 230690007         |
| CVA | SNOMEDCT_US | 230691006         |
| CVA | SNOMEDCT_US | 230698000         |
| CVA | SNOMEDCT_US | 230713003         |
| CVA | SNOMEDCT_US | 230714009         |
| CVA | SNOMEDCT_US | 230715005         |
| CVA | SNOMEDCT_US | 25133001          |
| CVA | SNOMEDCT_US | 266257000         |
| CVA | SNOMEDCT_US | 266312006         |
| CVA | SNOMEDCT_US | 270883006         |
| CVA | SNOMEDCT_US | 275434003         |
| CVA | SNOMEDCT_US | 276222004         |
| CVA | SNOMEDCT_US | 277381004         |
| CVA | SNOMEDCT_US | 281240008         |
| CVA | SNOMEDCT_US | 287731003         |

|     |             |                 |
|-----|-------------|-----------------|
| CVA | SNOMEDCT_US | 292661000119105 |
| CVA | SNOMEDCT_US | 292671000119104 |
| CVA | SNOMEDCT_US | 292681000119101 |
| CVA | SNOMEDCT_US | 292691000119103 |
| CVA | SNOMEDCT_US | 313267000       |
| CVA | SNOMEDCT_US | 329621000119105 |
| CVA | SNOMEDCT_US | 329641000119104 |
| CVA | SNOMEDCT_US | 371040005       |
| CVA | SNOMEDCT_US | 371041009       |
| CVA | SNOMEDCT_US | 371121002       |
| CVA | SNOMEDCT_US | 373606000       |
| CVA | SNOMEDCT_US | 39925003        |
| CVA | SNOMEDCT_US | 413102000       |
| CVA | SNOMEDCT_US | 413758000       |
| CVA | SNOMEDCT_US | 422504002       |
| CVA | SNOMEDCT_US | 426814001       |
| CVA | SNOMEDCT_US | 432504007       |
| CVA | SNOMEDCT_US | 434141000124103 |
| CVA | SNOMEDCT_US | 457551000124104 |
| CVA | SNOMEDCT_US | 5471000124102   |
| CVA | SNOMEDCT_US | 5571000124103   |
| CVA | SNOMEDCT_US | 57357009        |
| CVA | SNOMEDCT_US | 62914000        |
| CVA | SNOMEDCT_US | 710575003       |
| CVA | SNOMEDCT_US | 716051003       |
| CVA | SNOMEDCT_US | 723082006       |
| CVA | SNOMEDCT_US | 724424009       |
| CVA | SNOMEDCT_US | 724425005       |
| CVA | SNOMEDCT_US | 724426006       |



|     |             |                |
|-----|-------------|----------------|
| CVA | SNOMEDCT_US | 724429004      |
| CVA | SNOMEDCT_US | 724993002      |
| CVA | SNOMEDCT_US | 724994008      |
| CVA | SNOMEDCT_US | 725132001      |
| CVA | SNOMEDCT_US | 788880006      |
| CVA | SNOMEDCT_US | 788881005      |
| CVA | SNOMEDCT_US | 788882003      |
| CVA | SNOMEDCT_US | 788883008      |
| CVA | SNOMEDCT_US | 788884002      |
| CVA | SNOMEDCT_US | 9901000119100  |
| CVA | SNOMEDCT_US | 99451000119105 |

**Supplementary Table 2. Historical medical codes used for ACS and CVA event classification.**

| <b>Name</b>    | <b>System</b> | <b>Code</b> |
|----------------|---------------|-------------|
| history of ACS | ICD10CM       | I23         |
| history of ACS | ICD10CM       | I23.0       |
| history of ACS | ICD10CM       | I23.1       |
| history of ACS | ICD10CM       | I23.2       |
| history of ACS | ICD10CM       | I23.3       |
| history of ACS | ICD10CM       | I23.4       |
| history of ACS | ICD10CM       | I23.5       |
| history of ACS | ICD10CM       | I23.6       |
| history of ACS | ICD10CM       | I23.7       |
| history of ACS | ICD10CM       | I23.8       |
| history of ACS | ICD10CM       | I25.2       |
| history of ACS | ICD9CM        | 412         |
| history of ACS | ICD9CM        | 429.7       |
| history of ACS | SNOMEDCT_US   | 428752002   |
| history of ACS | SNOMEDCT_US   | 138774004   |

|                |             |           |
|----------------|-------------|-----------|
| history of ACS | SNOMEDCT_US | 138775003 |
| history of ACS | SNOMEDCT_US | 155306008 |
| history of ACS | SNOMEDCT_US | 161516005 |
| history of ACS | SNOMEDCT_US | 164867002 |
| history of ACS | SNOMEDCT_US | 1755008   |
| history of ACS | SNOMEDCT_US | 233839009 |
| history of ACS | SNOMEDCT_US | 233840006 |
| history of ACS | SNOMEDCT_US | 233841005 |
| history of ACS | SNOMEDCT_US | 233842003 |
| history of ACS | SNOMEDCT_US | 308065005 |
| history of ACS | SNOMEDCT_US | 32574007  |
| history of ACS | SNOMEDCT_US | 399211009 |
| history of ACS | SNOMEDCT_US | 698593009 |
| history of CVA | ICD10CM     | I69.30    |
| history of CVA | ICD10CM     | I69.311   |
| history of CVA | ICD10CM     | I69.320   |
| history of CVA | ICD10CM     | I69.359   |
| history of CVA | ICD10CM     | I69.398   |
| history of CVA | ICD10CM     | Z86.73    |
| history of CVA | ICD9CM      | 438       |
| history of CVA | ICD9CM      | 438.0     |
| history of CVA | ICD9CM      | 438.1     |
| history of CVA | ICD9CM      | 438.10    |
| history of CVA | ICD9CM      | 438.11    |
| history of CVA | ICD9CM      | 438.12    |
| history of CVA | ICD9CM      | 438.13    |
| history of CVA | ICD9CM      | 438.14    |
| history of CVA | ICD9CM      | 438.19    |
| history of CVA | ICD9CM      | 438.2     |

|                |             |                 |
|----------------|-------------|-----------------|
| history of CVA | ICD9CM      | 438.20          |
| history of CVA | ICD9CM      | 438.22          |
| history of CVA | ICD9CM      | 438.3           |
| history of CVA | ICD9CM      | 438.31          |
| history of CVA | ICD9CM      | 438.4           |
| history of CVA | ICD9CM      | 438.40          |
| history of CVA | ICD9CM      | 438.41          |
| history of CVA | ICD9CM      | 438.42          |
| history of CVA | ICD9CM      | 438.5           |
| history of CVA | ICD9CM      | 438.50          |
| history of CVA | ICD9CM      | 438.51          |
| history of CVA | ICD9CM      | 438.52          |
| history of CVA | ICD9CM      | 438.53          |
| history of CVA | ICD9CM      | 438.6           |
| history of CVA | ICD9CM      | 438.7           |
| history of CVA | ICD9CM      | 438.8           |
| history of CVA | ICD9CM      | 438.81          |
| history of CVA | ICD9CM      | 438.82          |
| history of CVA | ICD9CM      | 438.83          |
| history of CVA | ICD9CM      | 438.84          |
| history of CVA | ICD9CM      | 438.89          |
| history of CVA | ICD9CM      | 438.9           |
| history of CVA | SNOMEDCT_US | 118961000119101 |
| history of CVA | SNOMEDCT_US | 137991000119103 |
| history of CVA | SNOMEDCT_US | 138778001       |
| history of CVA | SNOMEDCT_US | 138787005       |
| history of CVA | SNOMEDCT_US | 140701000119108 |
| history of CVA | SNOMEDCT_US | 140711000119106 |
| history of CVA | SNOMEDCT_US | 161506002       |

|                |             |                   |
|----------------|-------------|-------------------|
| history of CVA | SNOMEDCT_US | 161511000         |
| history of CVA | SNOMEDCT_US | 161518006         |
| history of CVA | SNOMEDCT_US | 141281000119101   |
| history of CVA | SNOMEDCT_US | 141811000119106   |
| history of CVA | SNOMEDCT_US | 141821000119104   |
| history of CVA | SNOMEDCT_US | 16896851000119101 |
| history of CVA | SNOMEDCT_US | 16896891000119106 |
| history of CVA | SNOMEDCT_US | 275526006         |
| history of CVA | SNOMEDCT_US | 275527002         |
| history of CVA | SNOMEDCT_US | 271395009         |
| history of CVA | SNOMEDCT_US | 308067002         |
| history of CVA | SNOMEDCT_US | 429235008         |
| history of CVA | SNOMEDCT_US | 429993008         |
| history of CVA | SNOMEDCT_US | 432051000124108   |
| history of CVA | SNOMEDCT_US | 432191000124101   |
| history of CVA | SNOMEDCT_US | 440140008         |
| history of CVA | SNOMEDCT_US | 690051000119100   |

**Supplementary Table 3. Model features.**

| <b>Features</b>      | <b>Table</b> | <b>Lookback (Y)</b> | <b>Aggregation</b> |
|----------------------|--------------|---------------------|--------------------|
| gender_f             | Demographics | 100                 | N/A                |
| gender_m             | Demographics | 100                 | N/A                |
| bin_age_0-50         | Demographics | 100                 | N/A                |
| bin_age_50-70        | Demographics | 100                 | N/A                |
| bin_age_70-inf       | Demographics | 100                 | N/A                |
| age                  | Demographics | 100                 | Any                |
| per_cap_income       | Demographics | 100                 | N/A                |
| median_house_income  | Demographics | 100                 | N/A                |
| median_family_income | Demographics | 100                 | N/A                |

|                                              |              |     |        |
|----------------------------------------------|--------------|-----|--------|
| height                                       | Demographics | 100 | Median |
| family_member_history-family_angina          | FH           | 100 | Any    |
| family_member_history-family_arrhythmia      | FH           | 100 | Any    |
| family_member_history-family_atherosclerosis | FH           | 100 | Any    |
| family_member_history-family_cad             | FH           | 100 | Any    |
| family_member_history-family_cholesterol     | FH           | 100 | Any    |
| family_member_history-family_diabetes        | FH           | 100 | Any    |
| family_member_history-family_hf              | FH           | 100 | Any    |
| family_member_history-family_hypertension    | FH           | 100 | Any    |
| family_member_history-family_stroke          | FH           | 100 | Any    |
| alcohol-alcohol_status                       | Alcohol      | 100 | Any    |
| smoke_ever_smoke                             | Smoking      | 100 | Any    |
| observation-ALP (alkaline phosphatase)_U/L   | Observations | 10  | EWA    |
| observation-ALP (alkaline phosphatase)_U/dL  | Observations | 10  | EWA    |
| observation-ALT_U/L                          | Observations | 10  | EWA    |
| observation-ALT_U/dL                         | Observations | 10  | EWA    |
| observation-AST_U/L                          | Observations | 10  | EWA    |
| observation-AST_U/dL                         | Observations | 10  | EWA    |
| observation-BSA_m2                           | Observations | 10  | EWA    |
| observation-BUN/Creatinine ratio_mg/dL       | Observations | 10  | EWA    |
| observation-BUN/Creatinine ratio_mg/mg       | Observations | 10  | EWA    |
| observation-BUN/Creatinine ratio_{ratio}     | Observations | 10  | EWA    |
| observation-BUN_mg/dL                        | Observations | 10  | EWA    |
| observation-CRP_mg/L                         | Observations | 10  | EWA    |
| observation-CRP_mg/dL                        | Observations | 10  | EWA    |
| observation-Calcium_mg/dL                    | Observations | 10  | EWA    |
| observation-HbA1c_%                          | Observations | 10  | EWA    |
| observation-INR_{ratio}                      | Observations | 10  | EWA    |
| observation-LDL/HDL ratio_{ratio}            | Observations | 10  | EWA    |
| observation-NRBC_%                           | Observations | 10  | EWA    |
| observation-NRBC_/100{WBC}                   | Observations | 10  | EWA    |

|                                            |              |    |     |
|--------------------------------------------|--------------|----|-----|
| observation-NRBC_10*3/uL                   | Observations | 10 | EWA |
| observation-QRS duration_ms                | Observations | 10 | EWA |
| observation-QT interval_ms                 | Observations | 10 | EWA |
| observation-RBC in serum _/ _HPF_          | Observations | 10 | EWA |
| observation-RBC in serum _/uL              | Observations | 10 | EWA |
| observation-RBC in serum_10*3/uL           | Observations | 10 | EWA |
| observation-RBC in serum_10*6/uL           | Observations | 10 | EWA |
| observation-RBC in serum_U/L               | Observations | 10 | EWA |
| observation-RBC in urine _/ _HPF_          | Observations | 10 | EWA |
| observation-RBC in urine __HPF_            | Observations | 10 | EWA |
| observation-RDW cv_ %                      | Observations | 10 | EWA |
| observation-RDW sd_fL                      | Observations | 10 | EWA |
| observation-RDW_ %                         | Observations | 10 | EWA |
| observation-RDW_fL                         | Observations | 10 | EWA |
| observation-VLDL calc_mg/dL                | Observations | 10 | EWA |
| observation-VLDL_mg/dL                     | Observations | 10 | EWA |
| observation-WBC in urine _/ _HPF_          | Observations | 10 | EWA |
| observation-WBC in urine __HPF_            | Observations | 10 | EWA |
| observation-aPTT_s                         | Observations | 10 | EWA |
| observation-albumin (serum)_g/dL           | Observations | 10 | EWA |
| observation-albumin (urine)_mg/dL          | Observations | 10 | EWA |
| observation-albumin (urine)_ug/mL          | Observations | 10 | EWA |
| observation-albumin/creatinine ratio_mg/g  | Observations | 10 | EWA |
| observation-albumin/globulin ratio_g/dL    | Observations | 10 | EWA |
| observation-albumin/globulin ratio_mg/dL   | Observations | 10 | EWA |
| observation-albumin/globulin ratio_mmol/L  | Observations | 10 | EWA |
| observation-albumin/globulin ratio_{ratio} | Observations | 10 | EWA |
| observation-amylase_U/L                    | Observations | 10 | EWA |
| observation-anion gap_mL                   | Observations | 10 | EWA |
| observation-anion gap_mmol/L               | Observations | 10 | EWA |
| observation-atrial rate_ms                 | Observations | 10 | EWA |
| observation-basophil #_ %                  | Observations | 10 | EWA |

|                                                    |              |    |     |
|----------------------------------------------------|--------------|----|-----|
| observation-basophil #_/nL                         | Observations | 10 | EWA |
| observation-basophil #_/uL                         | Observations | 10 | EWA |
| observation-basophil #_10*3/uL                     | Observations | 10 | EWA |
| observation-basophil %_%                           | Observations | 10 | EWA |
| observation-bilirubin direct_mg/dL                 | Observations | 10 | EWA |
| observation-bilirubin indirect_mg/dL               | Observations | 10 | EWA |
| observation-bilirubin total_mg/dL                  | Observations | 10 | EWA |
| observation-bilirubin urine_mg/dL                  | Observations | 10 | EWA |
| observation-carbon dioxide_mmol/L                  | Observations | 10 | EWA |
| observation-casts, urine /_LPF_                    | Observations | 10 | EWA |
| observation-chloride_mmol/L                        | Observations | 10 | EWA |
| observation-chol/hdl ratio_%                       | Observations | 10 | EWA |
| observation-chol/hdl ratio_mg/dL                   | Observations | 10 | EWA |
| observation-chol/hdl ratio_{ratio}                 | Observations | 10 | EWA |
| observation-creatinine kinase (CK)_U/L             | Observations | 10 | EWA |
| observation-creatinine, serum_mg/dL                | Observations | 10 | EWA |
| observation-creatinine, urine_mg/dL                | Observations | 10 | EWA |
| observation-d-dimer_mg/L                           | Observations | 10 | EWA |
| observation-d-dimer_ng/mL                          | Observations | 10 | EWA |
| observation-d-dimer_ug/mL                          | Observations | 10 | EWA |
| observation-eosinophils #_%                        | Observations | 10 | EWA |
| observation-eosinophils #_/uL                      | Observations | 10 | EWA |
| observation-eosinophils #_10*3/uL                  | Observations | 10 | EWA |
| observation-eosinophils %_%                        | Observations | 10 | EWA |
| observation-epithelial cells /_HPF_                | Observations | 10 | EWA |
| observation-estimated average glucose (eAG)_mg/dL  | Observations | 10 | EWA |
| observation-estimated average glucose (eAG)_mmol/L | Observations | 10 | EWA |
| observation-estradiol_pg/mL                        | Observations | 10 | EWA |
| observation-ferritin_ng/mL                         | Observations | 10 | EWA |
| observation-ferritin_ug/L                          | Observations | 10 | EWA |
| observation-folate_ng/mL                           | Observations | 10 | EWA |

|                                             |              |    |     |
|---------------------------------------------|--------------|----|-----|
| observation-fsh_uU/mL                       | Observations | 10 | EWA |
| observation-globulin_g/dL                   | Observations | 10 | EWA |
| observation-glucose, serum_mg/dL            | Observations | 10 | EWA |
| observation-glucose, urine_mg/dL            | Observations | 10 | EWA |
| observation-hct_%                           | Observations | 10 | EWA |
| observation-height__in_i__                  | Observations | 10 | EWA |
| observation-height_cm                       | Observations | 10 | EWA |
| observation-hemoglobin_g/dL                 | Observations | 10 | EWA |
| observation-immature granulocytes #_%       | Observations | 10 | EWA |
| observation-immature granulocytes #_10*3/uL | Observations | 10 | EWA |
| observation-immature granulocytes %_%       | Observations | 10 | EWA |
| observation-insulin_uU/mL                   | Observations | 10 | EWA |
| observation-iron binding capacity_ug/dL     | Observations | 10 | EWA |
| observation-iron saturation_%               | Observations | 10 | EWA |
| observation-iron_ug/dL                      | Observations | 10 | EWA |
| observation-ketones, urine_mg/dL            | Observations | 10 | EWA |
| observation-leukocytes (WBC)_/_HPF_         | Observations | 10 | EWA |
| observation-leukocytes (WBC)_/nL            | Observations | 10 | EWA |
| observation-leukocytes (WBC)_/uL            | Observations | 10 | EWA |
| observation-leukocytes (WBC)_10*3/uL        | Observations | 10 | EWA |
| observation-lh_uU/mL                        | Observations | 10 | EWA |
| observation-lipase_U/L                      | Observations | 10 | EWA |
| observation-lymphocytes #_%                 | Observations | 10 | EWA |
| observation-lymphocytes #_/uL               | Observations | 10 | EWA |
| observation-lymphocytes #_10*3/uL           | Observations | 10 | EWA |
| observation-lymphocytes %_%                 | Observations | 10 | EWA |
| observation-magnesium_mg/dL                 | Observations | 10 | EWA |
| observation-magnesium_mmol/L                | Observations | 10 | EWA |
| observation-mch_pg                          | Observations | 10 | EWA |
| observation-mch_pg/dL                       | Observations | 10 | EWA |
| observation-mchc_%                          | Observations | 10 | EWA |



|                                        |              |    |     |
|----------------------------------------|--------------|----|-----|
| observation-mchc_g/dL                  | Observations | 10 | EWA |
| observation-mcv_fL                     | Observations | 10 | EWA |
| observation-monocytes #_%              | Observations | 10 | EWA |
| observation-monocytes #_/nL            | Observations | 10 | EWA |
| observation-monocytes #_/uL            | Observations | 10 | EWA |
| observation-monocytes #_10*3/uL        | Observations | 10 | EWA |
| observation-monocytes %_%              | Observations | 10 | EWA |
| observation-mpv_fL                     | Observations | 10 | EWA |
| observation-neutrophils #_%            | Observations | 10 | EWA |
| observation-neutrophils #_/nL          | Observations | 10 | EWA |
| observation-neutrophils #_/uL          | Observations | 10 | EWA |
| observation-neutrophils #_10*3/uL      | Observations | 10 | EWA |
| observation-neutrophils %_%            | Observations | 10 | EWA |
| observation-non-HDL cholesterol_mg/dL  | Observations | 10 | EWA |
| observation-osmolality calc_mosm/L     | Observations | 10 | EWA |
| observation-osmolality calc_mosm/kg    | Observations | 10 | EWA |
| observation-p axis_deg                 | Observations | 10 | EWA |
| observation-p-r interval_ms            | Observations | 10 | EWA |
| observation-ph, blood_U                | Observations | 10 | EWA |
| observation-ph, blood__pH__            | Observations | 10 | EWA |
| observation-ph, urine_U                | Observations | 10 | EWA |
| observation-ph, urine__pH__            | Observations | 10 | EWA |
| observation-phosphorus_mg/dL           | Observations | 10 | EWA |
| observation-platelet_/nL               | Observations | 10 | EWA |
| observation-platelet_/uL               | Observations | 10 | EWA |
| observation-platelet_10*3/uL           | Observations | 10 | EWA |
| observation-potassium_mmol/L           | Observations | 10 | EWA |
| observation-procalcitonin_ng/mL        | Observations | 10 | EWA |
| observation-progesterone_ng/mL         | Observations | 10 | EWA |
| observation-prolactin_ng/mL            | Observations | 10 | EWA |
| observation-protein total, serum_g/dL  | Observations | 10 | EWA |
| observation-protein total, serum_mg/dL | Observations | 10 | EWA |

|                                             |              |     |     |
|---------------------------------------------|--------------|-----|-----|
| observation-protein, urine_mg/dL            | Observations | 10  | EWA |
| observation-psa_ng/mL                       | Observations | 10  | EWA |
| observation-pt_s                            | Observations | 10  | EWA |
| observation-ptt_s                           | Observations | 10  | EWA |
| observation-qrs axis_deg                    | Observations | 10  | EWA |
| observation-r axis_deg                      | Observations | 10  | EWA |
| observation-respiratory rate_{Breaths}/min  | Observations | 10  | EWA |
| observation-rheumatoid factor_U/mL          | Observations | 10  | EWA |
| observation-sedimentation rate (ESR)_mm/h   | Observations | 10  | EWA |
| observation-sodium_mmol/L                   | Observations | 10  | EWA |
| observation-spo2_%_%                        | Observations | 10  | EWA |
| observation-t axis_deg                      | Observations | 10  | EWA |
| observation-t3_pg/mL                        | Observations | 10  | EWA |
| observation-t4, free_ng/dL                  | Observations | 10  | EWA |
| observation-temperature oral_Cel            | Observations | 10  | EWA |
| observation-temperature temporal artery_Cel | Observations | 10  | EWA |
| observation-testosterone_ng/dL              | Observations | 10  | EWA |
| observation-triglyceride_mg/dL              | Observations | 10  | EWA |
| observation-troponin i_ng/L                 | Observations | 10  | EWA |
| observation-troponin i_ng/mL                | Observations | 10  | EWA |
| observation-troponin i_pg/mL                | Observations | 10  | EWA |
| observation-tsh_uU/L                        | Observations | 10  | EWA |
| observation-tsh_uU/mL                       | Observations | 10  | EWA |
| observation-uric acid_mg/dL                 | Observations | 10  | EWA |
| observation-urobilinogen, urine_mg/dL       | Observations | 10  | EWA |
| observation-vitamin b-12_pg/mL              | Observations | 10  | EWA |
| observation-vitamin d_ng/mL                 | Observations | 10  | EWA |
| observation-weight_lb_av_                   | Observations | 10  | EWA |
| observation-weight_kg                       | Observations | 10  | EWA |
| observation-egfr_together_mixed             | Observations | 10  | EWA |
| bp_meds-bp_meds                             | Medications  | 100 | Any |
| cholesterol_meds-cholesterol_meds           | Medications  | 100 | Any |

|                                                                                           |             |     |      |
|-------------------------------------------------------------------------------------------|-------------|-----|------|
| cholesterol_meds-statin_meds                                                              | Medications | 100 | Any  |
| cholesterol-hdl                                                                           | Cholesterol | 10  | Last |
| cholesterol-ldl                                                                           | Cholesterol | 10  | Last |
| cholesterol-total                                                                         | Cholesterol | 10  | Last |
| cholesterol-triglycerides                                                                 | Cholesterol | 10  | Last |
| chosen_conditions-RTI                                                                     | Conditions  | 100 | Any  |
| chosen_conditions-atrial_fibrillation                                                     | Conditions  | 100 | Any  |
| chosen_conditions-bells_palsy                                                             | Conditions  | 100 | Any  |
| chosen_conditions-diabetes_1                                                              | Conditions  | 100 | Any  |
| chosen_conditions-diabetes_2                                                              | Conditions  | 100 | Any  |
| chosen_conditions-erectile_dysfunction                                                    | Conditions  | 100 | Any  |
| chosen_conditions-hypertension                                                            | Conditions  | 100 | Any  |
| chosen_conditions-kidney_disease                                                          | Conditions  | 100 | Any  |
| chosen_conditions-lupus_erythematosu                                                      | Conditions  | 100 | Any  |
| chosen_conditions-mental_illness                                                          | Conditions  | 100 | Any  |
| chosen_conditions-migraines                                                               | Procedures  | 100 | Any  |
| chosen_conditions-rheumatoid_arthritis                                                    | Procedures  | 100 | Any  |
| chosen_procedures-<br>artries_and_veins_surgeries                                         | Procedures  | 100 | Any  |
| chosen_procedures-bnp                                                                     | Procedures  | 100 | Any  |
| chosen_procedures-<br>cardiac_catheterization_procedures                                  | Procedures  | 100 | Any  |
| chosen_procedures-cardiography_procedures                                                 | Procedures  | 100 | Any  |
| chosen_procedures-<br>cardiovascular_monitoring_services                                  | Procedures  | 100 | Any  |
| chosen_procedures-<br>cerebrovascular_arterial_studies                                    | Procedures  | 100 | Any  |
| chosen_procedures-chest_vessels                                                           | Procedures  | 100 | Any  |
| chosen_procedures-ck                                                                      | Procedures  | 100 | Any  |
| chosen_procedures-<br>diagnostic_nuclear_medicine_procedures_on_<br>cardiovascular_system | Procedures  | 100 | Any  |

|                                                                |              |      |      |
|----------------------------------------------------------------|--------------|------|------|
| chosen_procedures-diagnostic_radiology_procedures_of_the_heart | Procedures   | 100  | Any  |
| chosen_procedures-echocardiography_procedures                  | Procedures   | 100  | Any  |
| chosen_procedures-extremity_arterial_studies                   | Procedures   | 100  | Any  |
| chosen_procedures-extremity_venous_studies                     | Procedures   | 100  | Any  |
| chosen_procedures-other_cardiovascular_procedures              | Procedures   | 100  | Any  |
| chosen_procedures-pulmonary_vessels                            | Procedures   | 100  | Any  |
| chosen_procedures-troponin                                     | Procedures   | 100  | Any  |
| chosen_procedures-visceral_and_penile_vascular_studies         | Procedures   | 100  | Any  |
| bps-diastolic_bp                                               | BP           | 10   | Last |
| bps-heart_rate                                                 | BP           | 10   | Last |
| bps-systolic_bp                                                | BP           | 10   | Last |
| app_bps-systolic_bp_mixed                                      | BP+mHealth   | 100  | Any  |
| app_bps-diastolic_bp_mixed                                     | BP+mHealth   | 100  | Any  |
| app_bps-heart_rate_mixed                                       | BP+mHealth   | 100  | Any  |
| num_records_app_bps_90                                         | mHealth      | 0.25 | Any  |
| num_records_90                                                 | EHR Combined | 0.25 | N/A  |
| num_records                                                    | EHR Combined | 100  | N/A  |
| emb_CBOW_CO_embeddings_50_0                                    | EHR Combined | 100  | Mean |
| emb_CBOW_CO_embeddings_50_1                                    | EHR Combined | 100  | Mean |
| emb_CBOW_CO_embeddings_50_2                                    | EHR Combined | 100  | Mean |
| emb_CBOW_CO_embeddings_50_3                                    | EHR Combined | 100  | Mean |
| emb_CBOW_CO_embeddings_50_4                                    | EHR Combined | 100  | Mean |
| emb_CBOW_CO_embeddings_50_5                                    | EHR Combined | 100  | Mean |
| emb_CBOW_CO_embeddings_50_6                                    | EHR Combined | 100  | Mean |
| emb_CBOW_CO_embeddings_50_7                                    | EHR Combined | 100  | Mean |
| emb_CBOW_CO_embeddings_50_8                                    | EHR Combined | 100  | Mean |
| emb_CBOW_CO_embeddings_50_9                                    | EHR Combined | 100  | Mean |
| emb_CBOW_CO_embeddings_50_10                                   | EHR Combined | 100  | Mean |

|                              |              |     |      |
|------------------------------|--------------|-----|------|
| emb_CBOW_CO_embeddings_50_11 | EHR Combined | 100 | Mean |
| emb_CBOW_CO_embeddings_50_12 | EHR Combined | 100 | Mean |
| emb_CBOW_CO_embeddings_50_13 | EHR Combined | 100 | Mean |
| emb_CBOW_CO_embeddings_50_14 | EHR Combined | 100 | Mean |
| emb_CBOW_CO_embeddings_50_15 | EHR Combined | 100 | Mean |
| emb_CBOW_CO_embeddings_50_16 | EHR Combined | 100 | Mean |
| emb_CBOW_CO_embeddings_50_17 | EHR Combined | 100 | Mean |
| emb_CBOW_CO_embeddings_50_18 | EHR Combined | 100 | Mean |
| emb_CBOW_CO_embeddings_50_19 | EHR Combined | 100 | Mean |
| emb_CBOW_CO_embeddings_50_20 | EHR Combined | 100 | Mean |
| emb_CBOW_CO_embeddings_50_21 | EHR Combined | 100 | Mean |
| emb_CBOW_CO_embeddings_50_22 | EHR Combined | 100 | Mean |
| emb_CBOW_CO_embeddings_50_23 | EHR Combined | 100 | Mean |
| emb_CBOW_CO_embeddings_50_24 | EHR Combined | 100 | Mean |
| emb_CBOW_CO_embeddings_50_25 | EHR Combined | 100 | Mean |
| emb_CBOW_CO_embeddings_50_26 | EHR Combined | 100 | Mean |
| emb_CBOW_CO_embeddings_50_27 | EHR Combined | 100 | Mean |
| emb_CBOW_CO_embeddings_50_28 | EHR Combined | 100 | Mean |
| emb_CBOW_CO_embeddings_50_29 | EHR Combined | 100 | Mean |
| emb_CBOW_CO_embeddings_50_30 | EHR Combined | 100 | Mean |
| emb_CBOW_CO_embeddings_50_31 | EHR Combined | 100 | Mean |
| emb_CBOW_CO_embeddings_50_32 | EHR Combined | 100 | Mean |
| emb_CBOW_CO_embeddings_50_33 | EHR Combined | 100 | Mean |
| emb_CBOW_CO_embeddings_50_34 | EHR Combined | 100 | Mean |
| emb_CBOW_CO_embeddings_50_35 | EHR Combined | 100 | Mean |
| emb_CBOW_CO_embeddings_50_36 | EHR Combined | 100 | Mean |
| emb_CBOW_CO_embeddings_50_37 | EHR Combined | 100 | Mean |
| emb_CBOW_CO_embeddings_50_38 | EHR Combined | 100 | Mean |
| emb_CBOW_CO_embeddings_50_39 | EHR Combined | 100 | Mean |
| emb_CBOW_CO_embeddings_50_40 | EHR Combined | 100 | Mean |
| emb_CBOW_CO_embeddings_50_41 | EHR Combined | 100 | Mean |
| emb_CBOW_CO_embeddings_50_42 | EHR Combined | 100 | Mean |

|                              |              |     |      |
|------------------------------|--------------|-----|------|
| emb_CBOW_CO_embeddings_50_43 | EHR Combined | 100 | Mean |
| emb_CBOW_CO_embeddings_50_44 | EHR Combined | 100 | Mean |
| emb_CBOW_CO_embeddings_50_45 | EHR Combined | 100 | Mean |
| emb_CBOW_CO_embeddings_50_46 | EHR Combined | 100 | Mean |
| emb_CBOW_CO_embeddings_50_47 | EHR Combined | 100 | Mean |
| emb_CBOW_CO_embeddings_50_48 | EHR Combined | 100 | Mean |
| emb_CBOW_CO_embeddings_50_49 | EHR Combined | 100 | Mean |

**Supplementary Table 4. Lookback period and aggregation.**

| <b>Resource type</b> | <b>Lookback (Y)</b> | <b>Aggregation method</b> |
|----------------------|---------------------|---------------------------|
| Family history       | 100                 | Any                       |
| Smoking              | 100                 | Any                       |
| Alcohol              | 100                 | Any                       |
| Observations         | 10                  | EWA                       |
| Medication           | 100                 | Any                       |
| Cholesterol          | 10                  | Last                      |
| Blood pressure       | 10                  | Last                      |
| Conditions           | 100                 | Any                       |
| Procedures           | 100                 | Any                       |
| ICD10 embedding      | 100                 | Mean                      |

## 2.2 Supplementary Figures

### Supplementary Figure 1. ACS labeling protocol and counts.

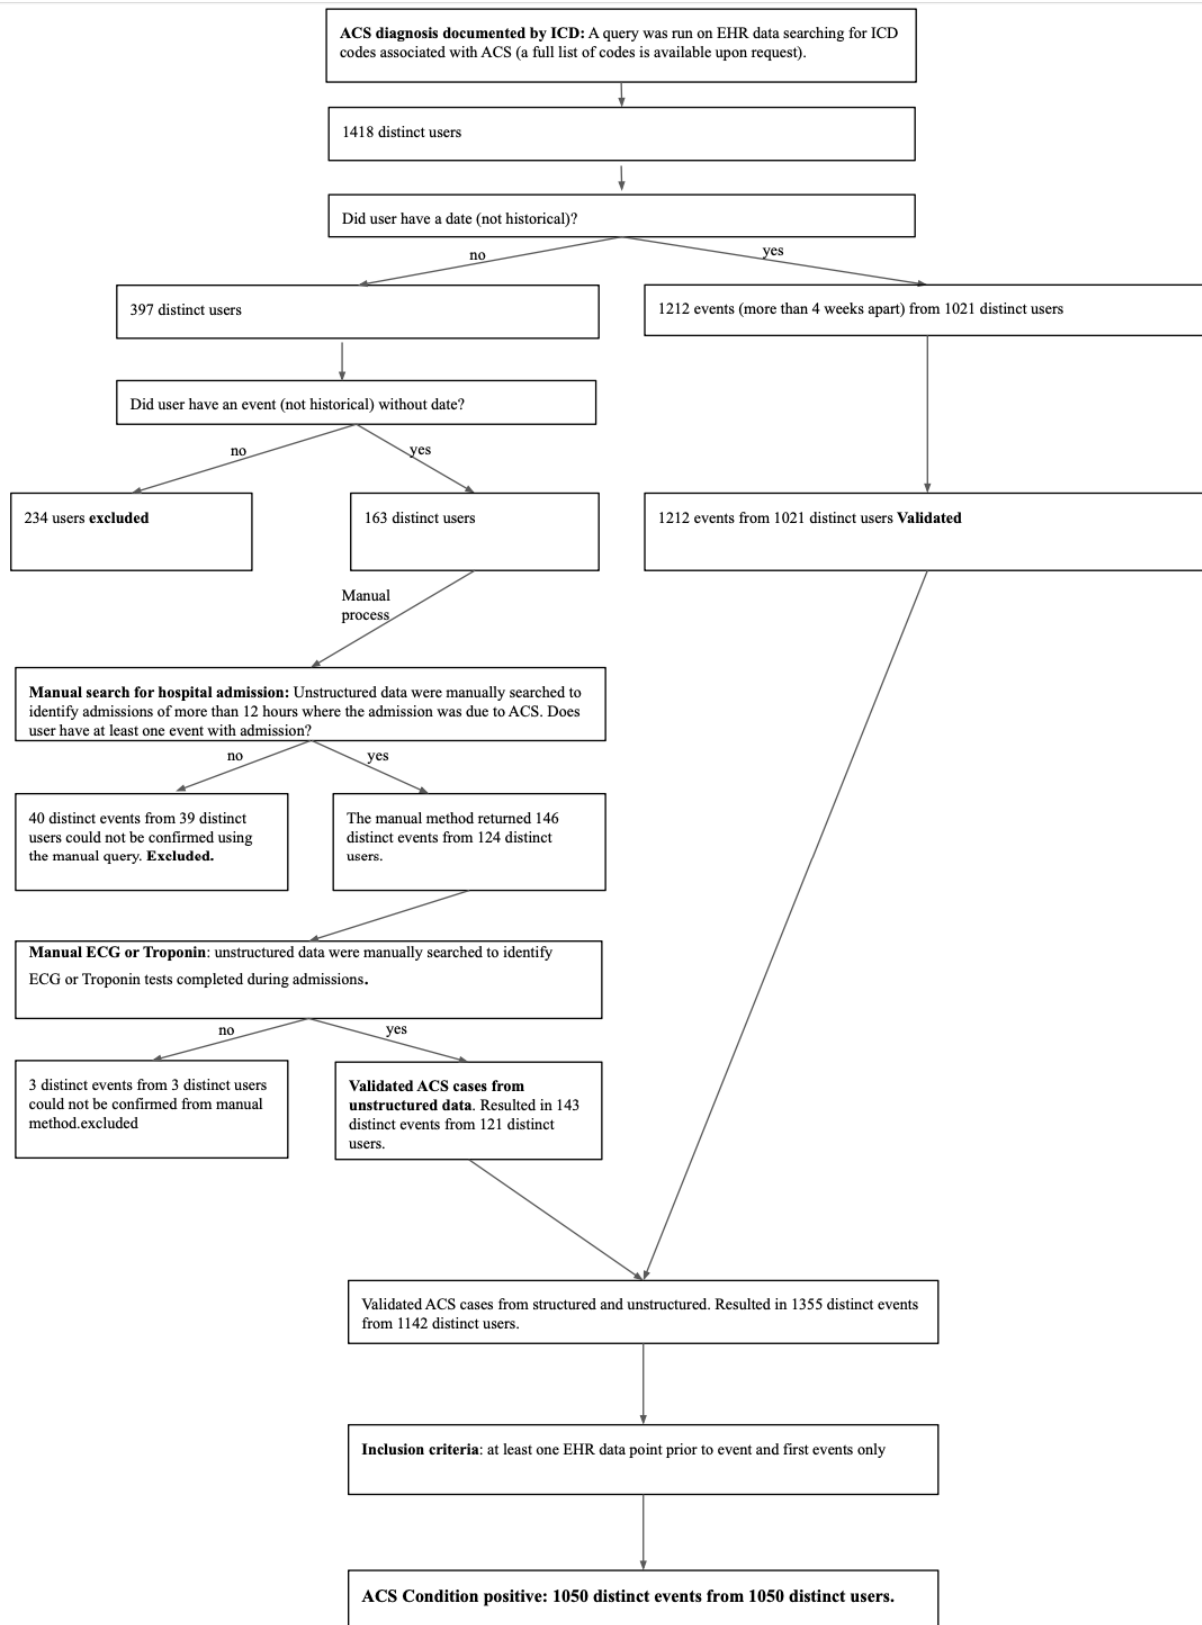

**Supplementary Figure 2. CVA labeling protocol and counts.**

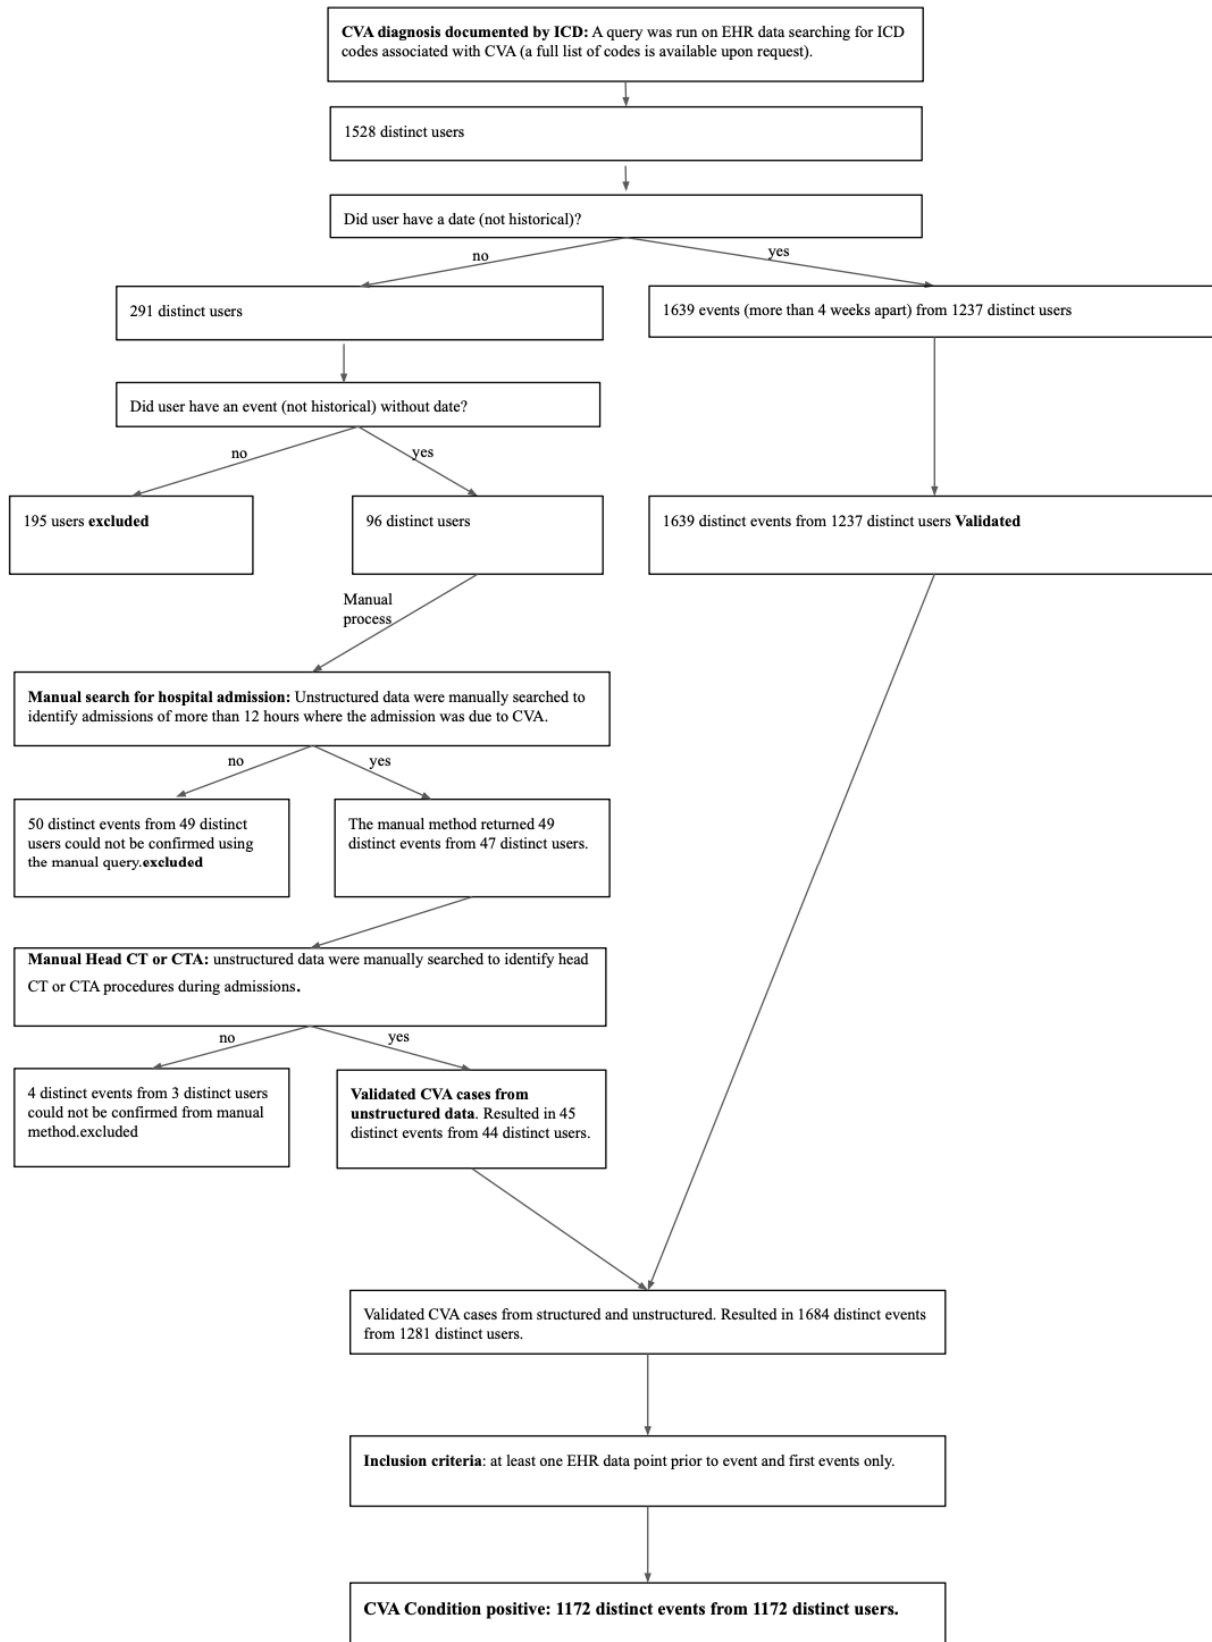



**Supplementary Figure 3. Percent positive for high vs. low model prediction (prediction values).**

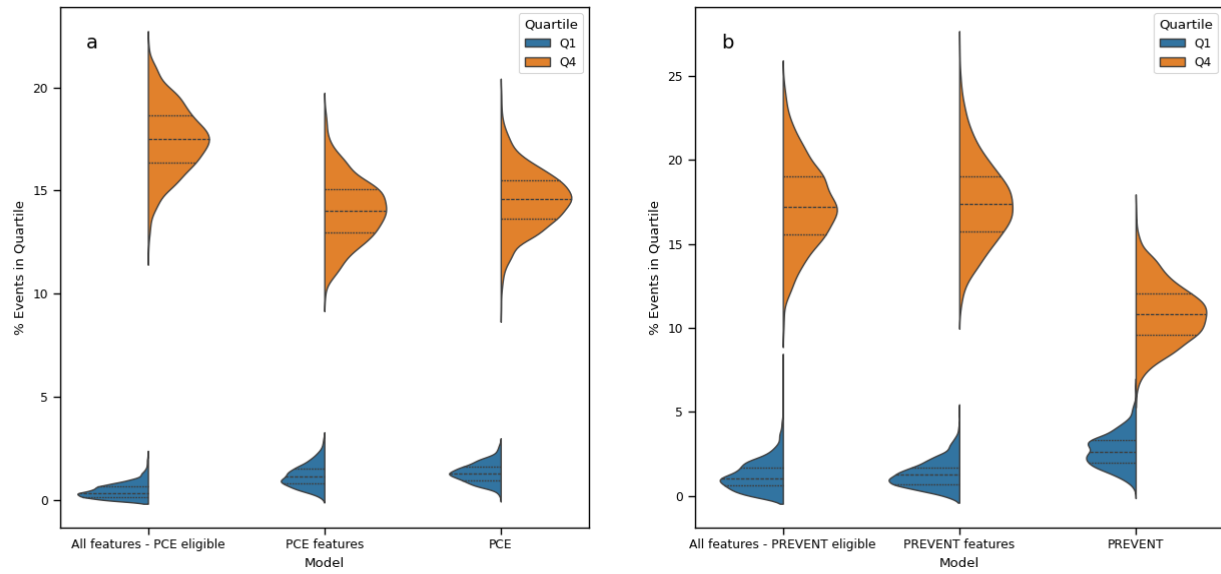

4th quartile (25% with the highest prediction scores) in orange vs 1st quartile (25% with lowest prediction scores) in blue. Distributions are calculated from the 1000 bootstrapping iterations. (a) PCE eligible population (b) PREVENT eligible population.

**Supplementary Figure 4. Shapley values beeswarm plots (a) 90-day prediction (b) 365-day prediction.**

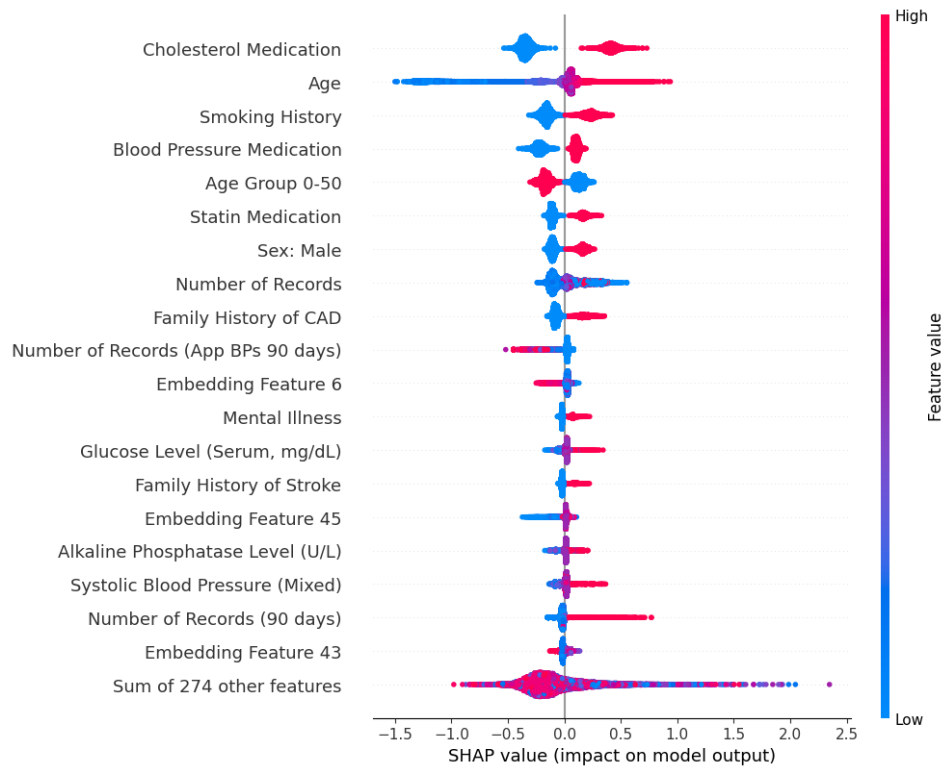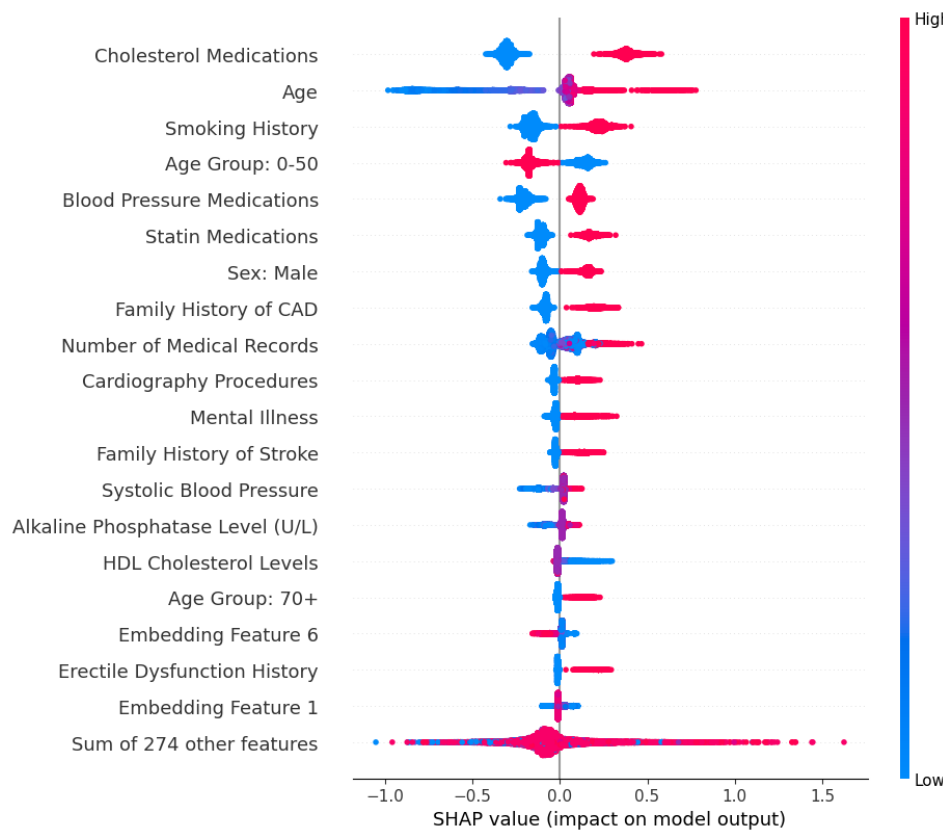

**Supplementary Figure 5. ROC plots 90-day (left) and 365-day (right) prediction periods for the population with mHealth data before ASCVD event.**

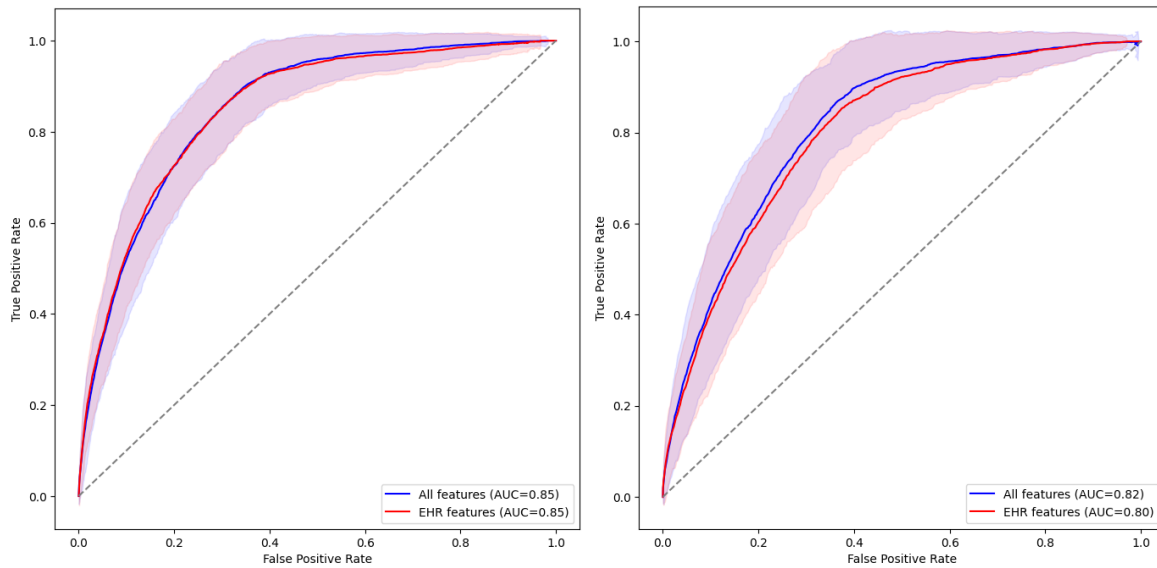

**Supplementary Figure 6. Shapley values beeswarm plots 90-day (left) and 365-day (right) prediction periods for the population with mHealth data before ASCVD event.**

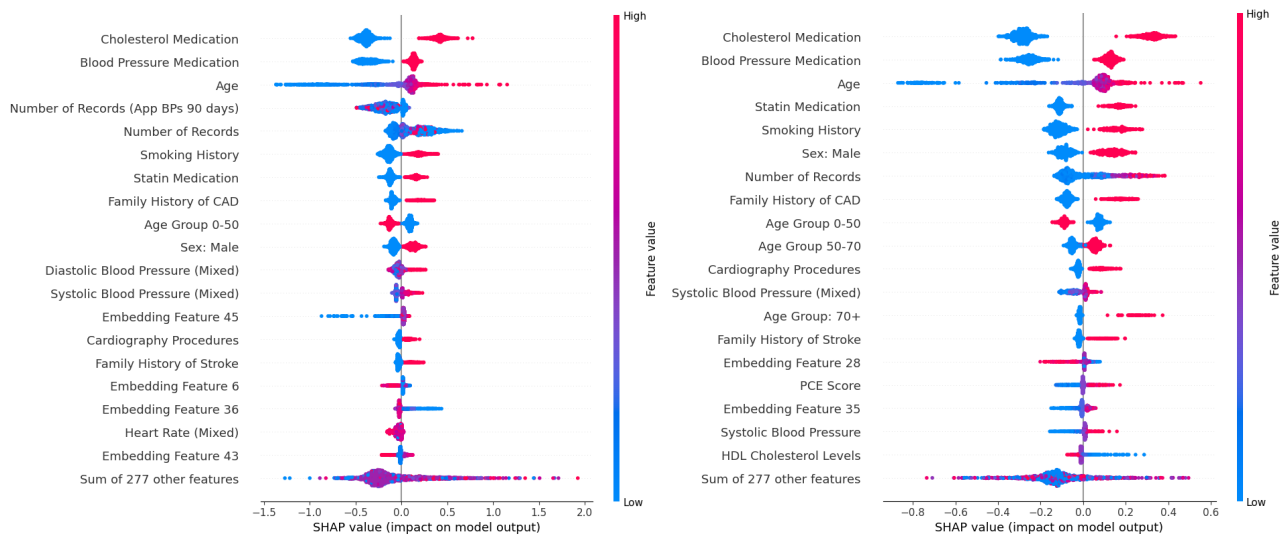

Supplement: Datasheet1.pdf [file Datasheet1.pdf]
